# Supplementary material for: Preclinical Evaluation of Novel Folate Receptor 1-Directed CAR T Cells for Ovarian Cancer
Source: MDPI journal article supplement (doi:10.3390/cancers16020333), 2024-01-12
Supplement: s1 [file s1]

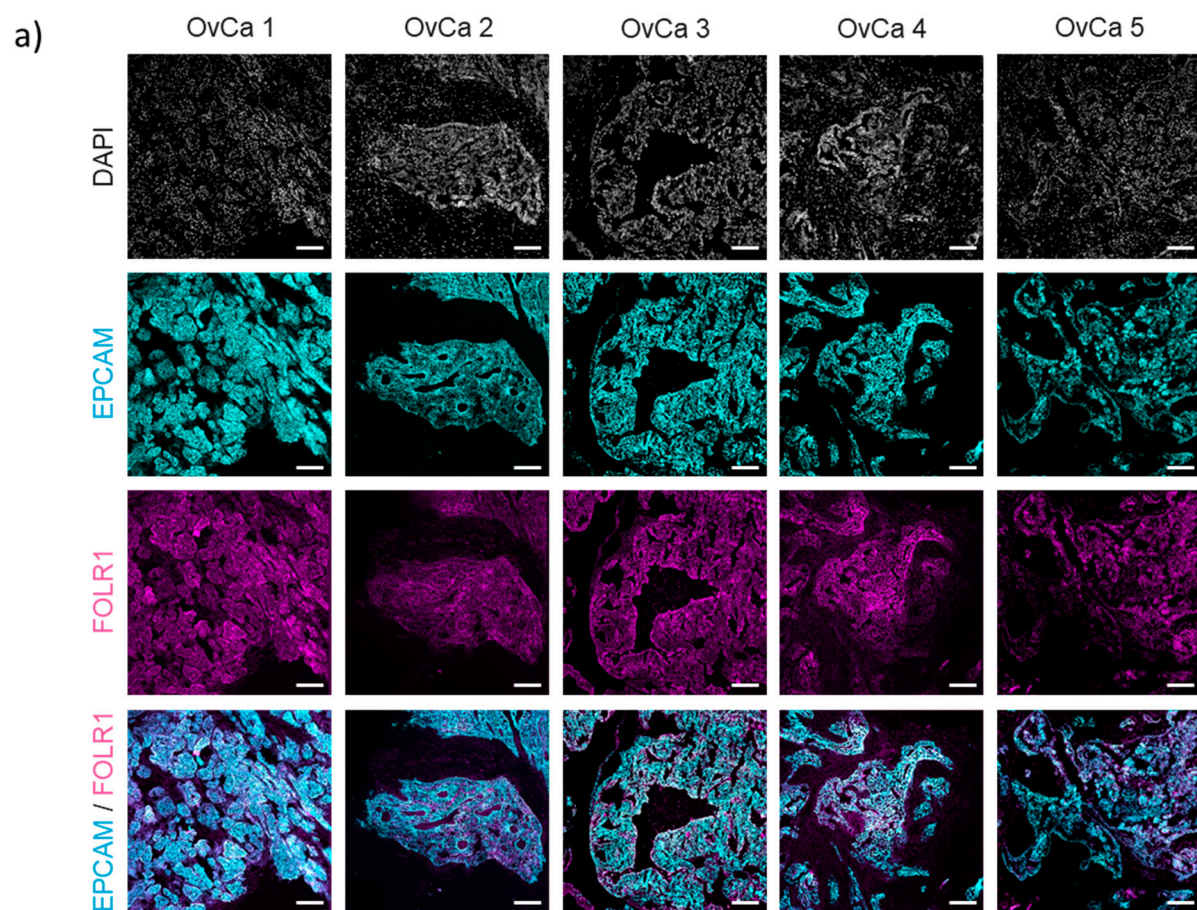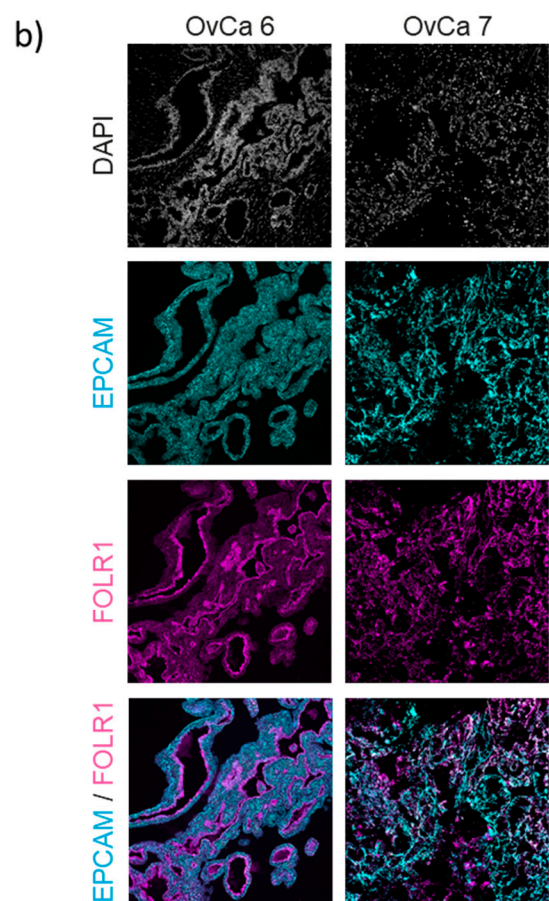

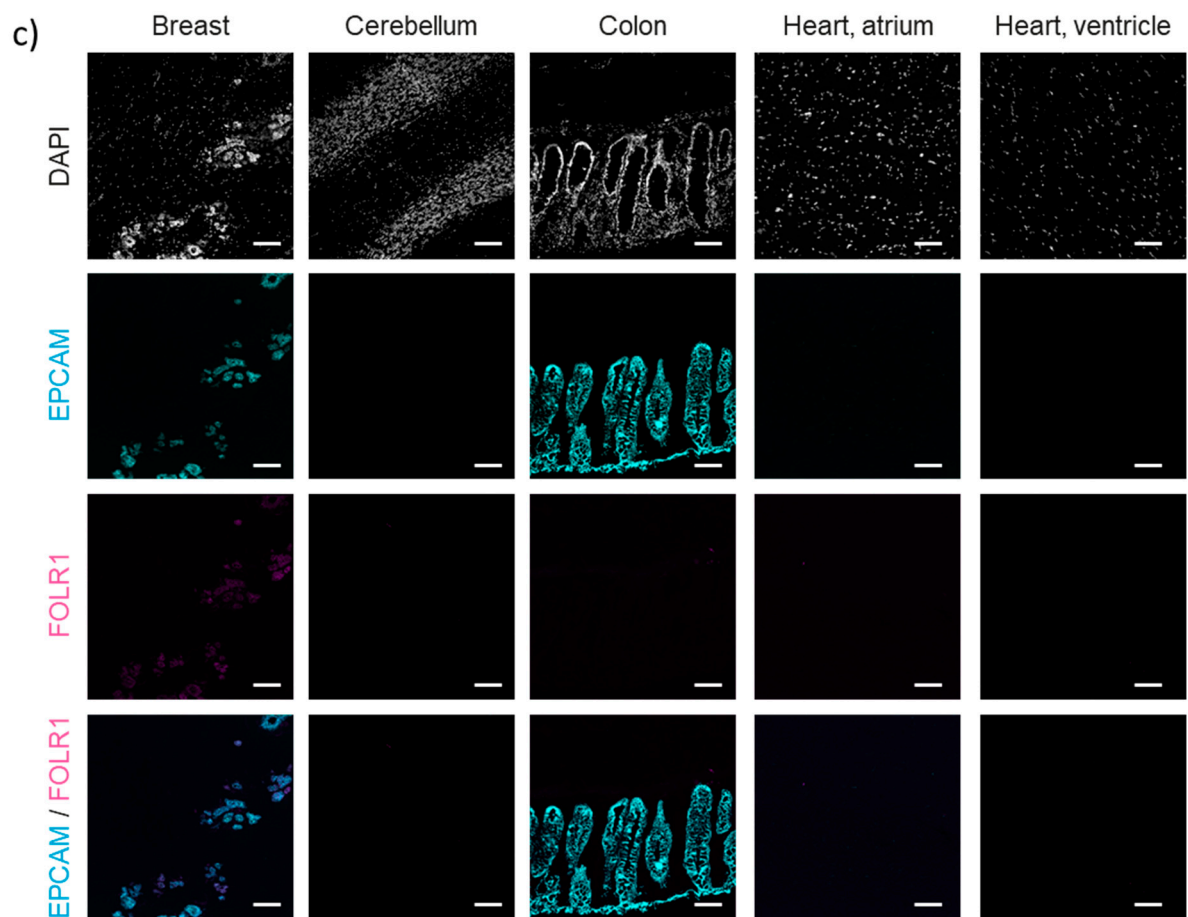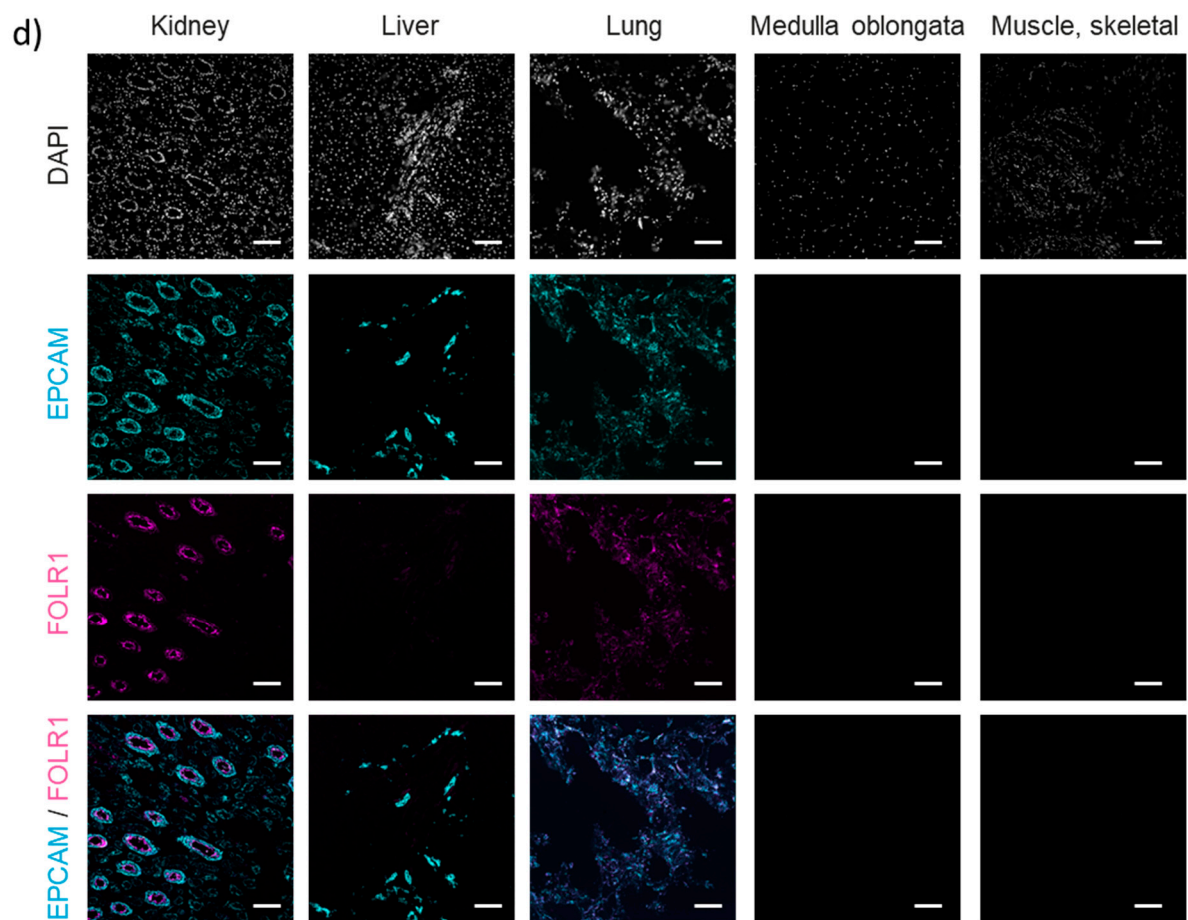



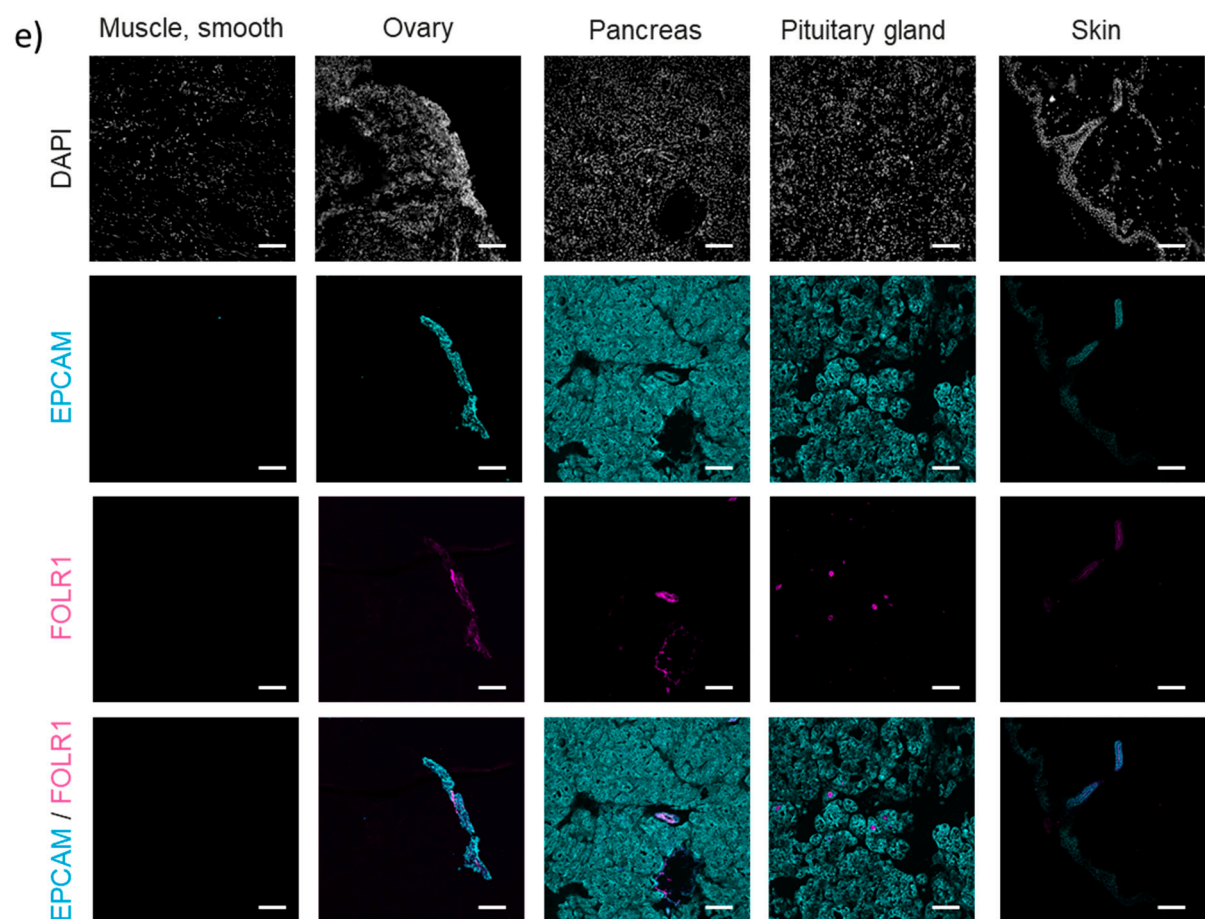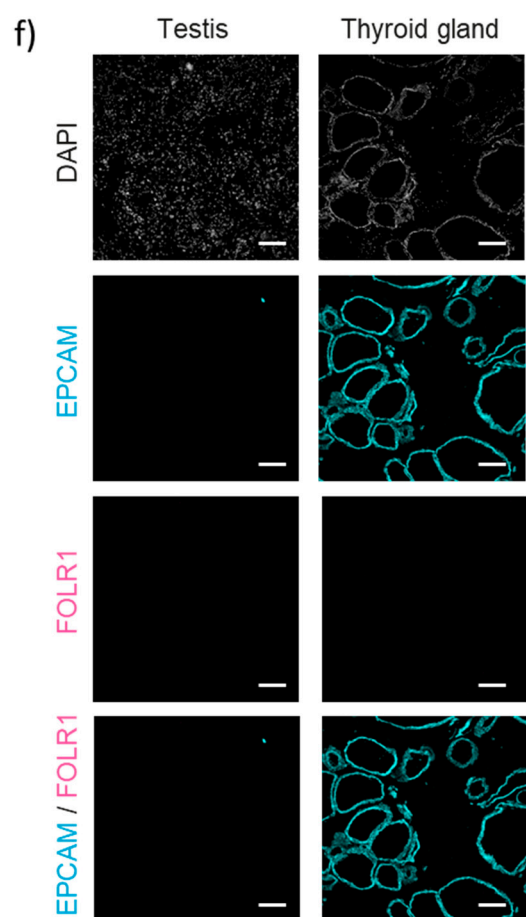

**Supplementary Figure S1.** Ultrahigh-content imaging revealing FOLR1 expression in high-grade serous epithelial ovarian cancer and healthy tissues.

(a, b), Fresh-frozen HGSOC samples (each number indicates an individual patient sample) were sliced and analyzed by MICS. Sequential staining of DAPI (white), EPCAM (cyan), and FOLR1 (magenta) are represented, as well as co-expression of EPCAM and FOLR1 in the lower panels. Healthy tissues samples (c) breast, cerebellum, colon, heart-atrium, heart-ventricle, (d) kidney, liver, lung, medulla oblongata, skeletal muscle, (e) smooth muscle, ovary, pancreas, pituitary gland, skin, (f) testis and thyroid gland were sliced and analyzed by MICS. Sequential staining of DAPI (white), EPCAM (cyan), and FOLR1 (magenta) are represented, as well as co-expression of EPCAM and FOLR1 in the lower panels. Scale bar represents 100  $\mu\text{m}$ .

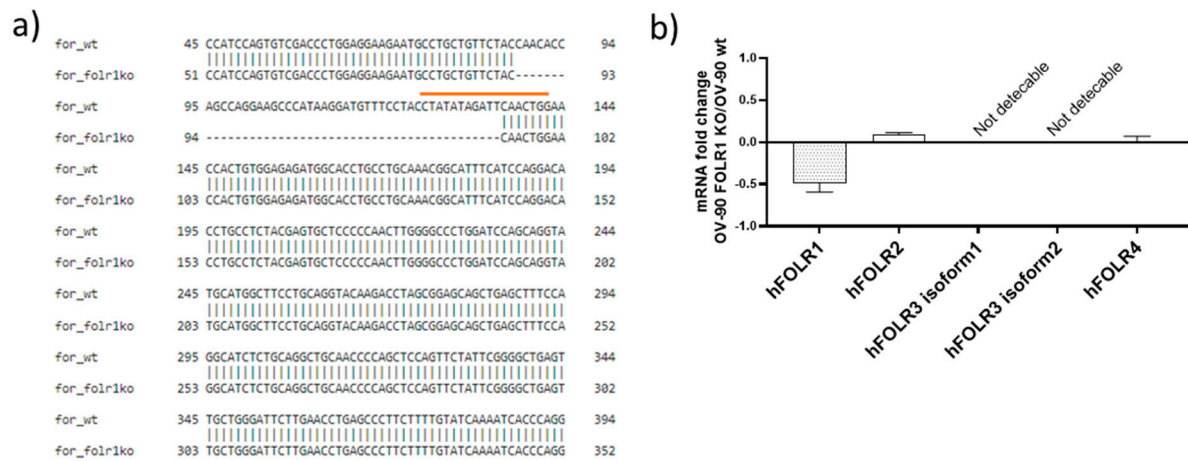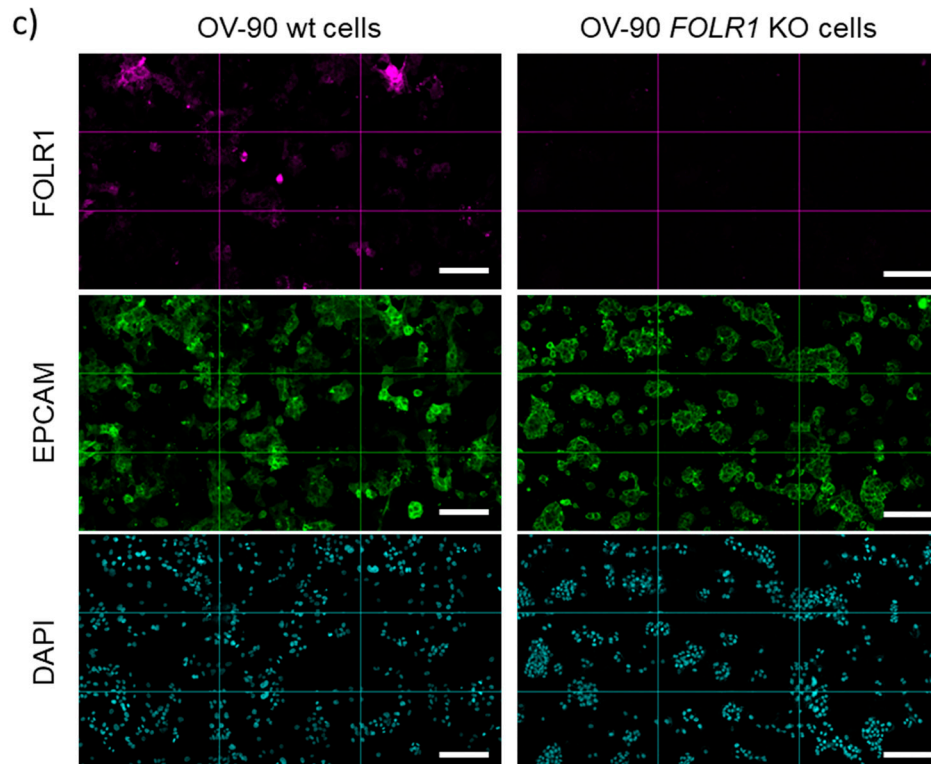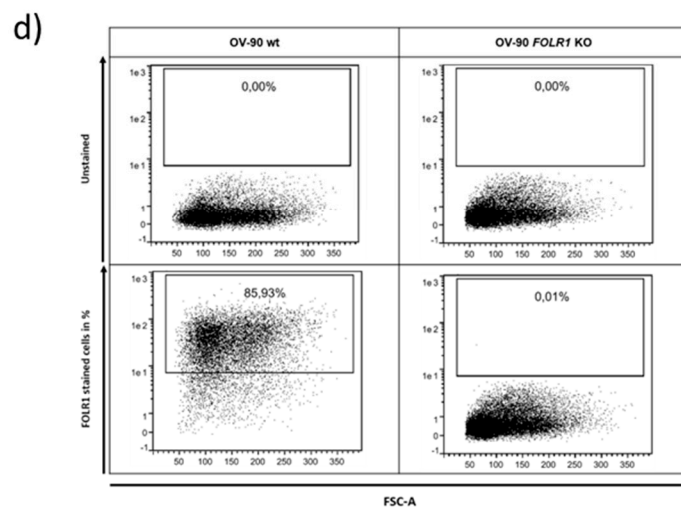

**Supplementary Figure S2.** CRISPR/CAS9-mediated *FOLR1* knock-out in OV-90 cells is validated at genome, transcript, and protein level. Deletion in *FOLR1* led to homozygous knock-out in OV-90 cells. **(a)** Alignment of OV-90 wt (for\_wt) and OV-90 *FOLR1* KO (for\_folrko) genomic DNA sequences using EMBOSS needle algorithm. The sequence highlighted with orange line corresponds to the guide RNA sequence used for the CRISPR/CAS9-mediated knock-out of *FOLR1*. **(b)** Relative mRNA expression of folate receptor variants in OV-90 *FOLR1* KO compared to OV-90 wt cells. *FOLR* transcripts were amplified with primer pairs for different folate receptors variants. Individual gene expression is analyzed by  $\Delta\Delta C_t$  method, normalized to GAPDH mRNA expression and fold change is relative to OV-90 wt mRNA levels. Data is shown as mean  $\pm$  SEM. **(c)** Immune fluorescence anti-*FOLR1* staining of OV-90 wt as well as OV-90 *FOLR1* KO cells. Cells were analyzed for the expression of *FOLR1* and EPCAM. DAPI visualizes nuclei. Scale bar represents 100  $\mu$ m. **(d)** Flow cytometric analysis of *FOLR1* expression in OV-90 wt as well as OV-90 *FOLR1* KO cells.

a)

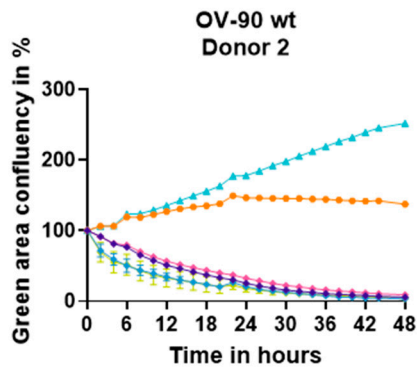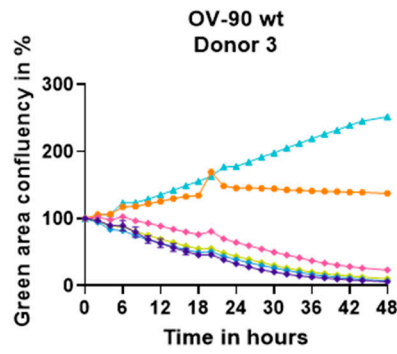

A  
B  
C  
D  
Mock  
Untreated

α-FOLR1 CAR

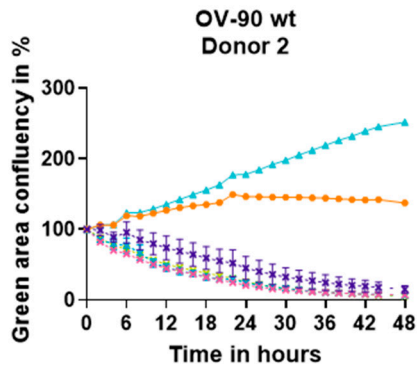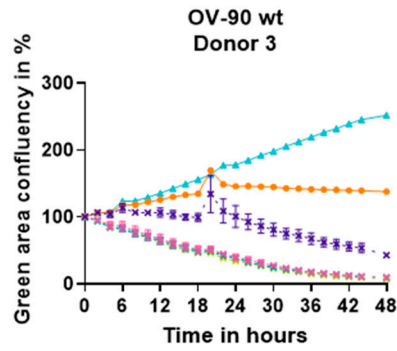

E  
F  
G  
H  
Mock  
Untreated

α-FOLR1 CAR

b)

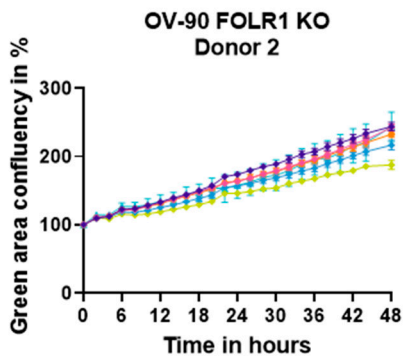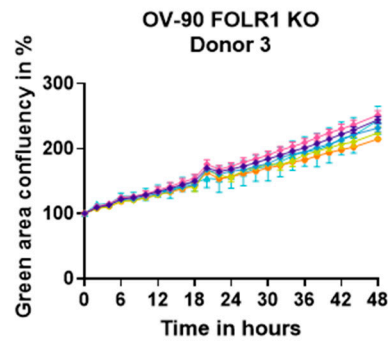

A  
B  
C  
D  
Mock  
Untreated

α-FOLR1 CAR

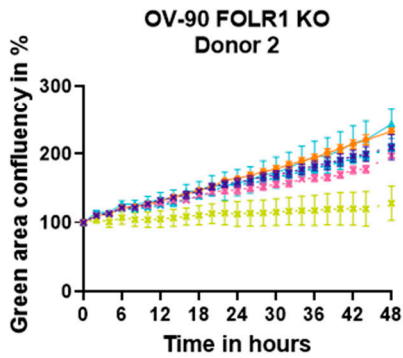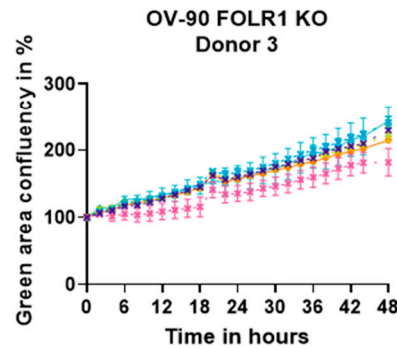

E  
F  
G  
H  
Mock  
Untreated

α-FOLR1 CAR

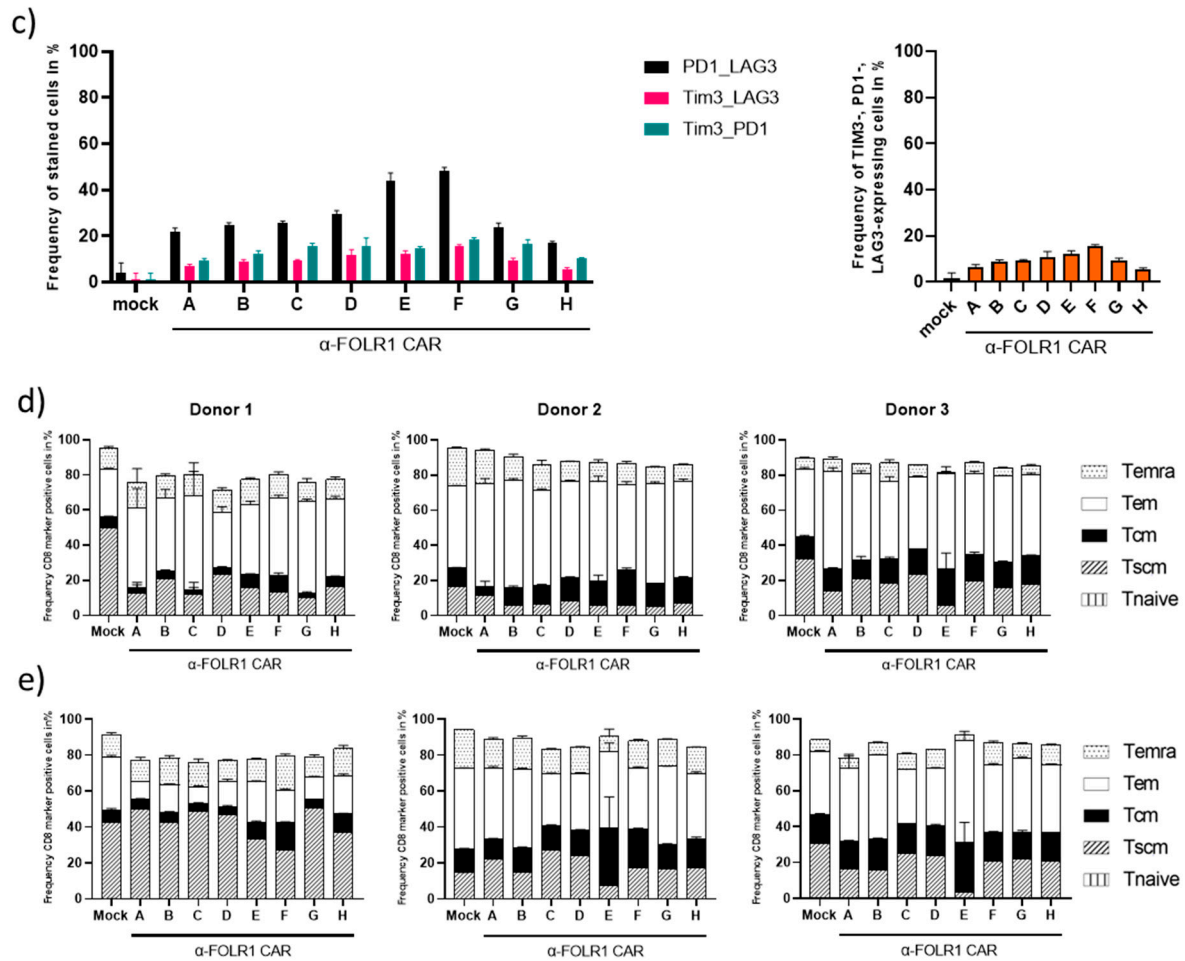

**Supplementary Figure S3.** Additional healthy donor-derived FOLR1-directed CAR T cells confirm *in vitro* co-culture kinetics. (a) Representative killing kinetic of OV-90 wt in co-culture with the different FOLR1-specific CAR T cells at an effector to target ratios of 2:1. Each datapoint represents mean  $\pm$  SEM (n=3). (b) Representative killing kinetic of OV-90 FOLR1 KO in co-culture with the different FOLR1-specific CAR T cells at an effector to target ratios of 2:1. Each datapoint represents mean  $\pm$  SEM (n=3). (c) Anti-FOLR1 CAR T cells (CD8 T cells) were phenotyped after co-cultivation. Anti-FOLR1 CAR T cells or untransduced T cells (Mock) from three independent donors were co-cultured with (d) OV-90 wt cells or (e) OV-90 FOLR1 KO cells at an effector cell : target cell ratio of 2:1. After 48 hours of co-culture, T cells were assessed for phenotype markers expression by flow cytometry. T cell subtypes were defined as following: Tscm – CD45RO<sup>-</sup> CD197<sup>+</sup> CD62L<sup>+</sup> CD95<sup>+</sup>, Tnaive – CD45RO<sup>-</sup> CD197<sup>+</sup> CD62L<sup>+</sup> CD95<sup>-</sup>, Temra – CD45RO<sup>-</sup> CD197<sup>-</sup> CD62L<sup>-</sup> CD95<sup>+</sup>, Tem – CD45RO<sup>+</sup> CD62L<sup>-</sup> CD95<sup>+</sup>, and Tcm – CD45RO<sup>+</sup> CD62L<sup>+</sup> CD95<sup>+</sup>. Each bar represents mean  $\pm$  SEM (n=3).



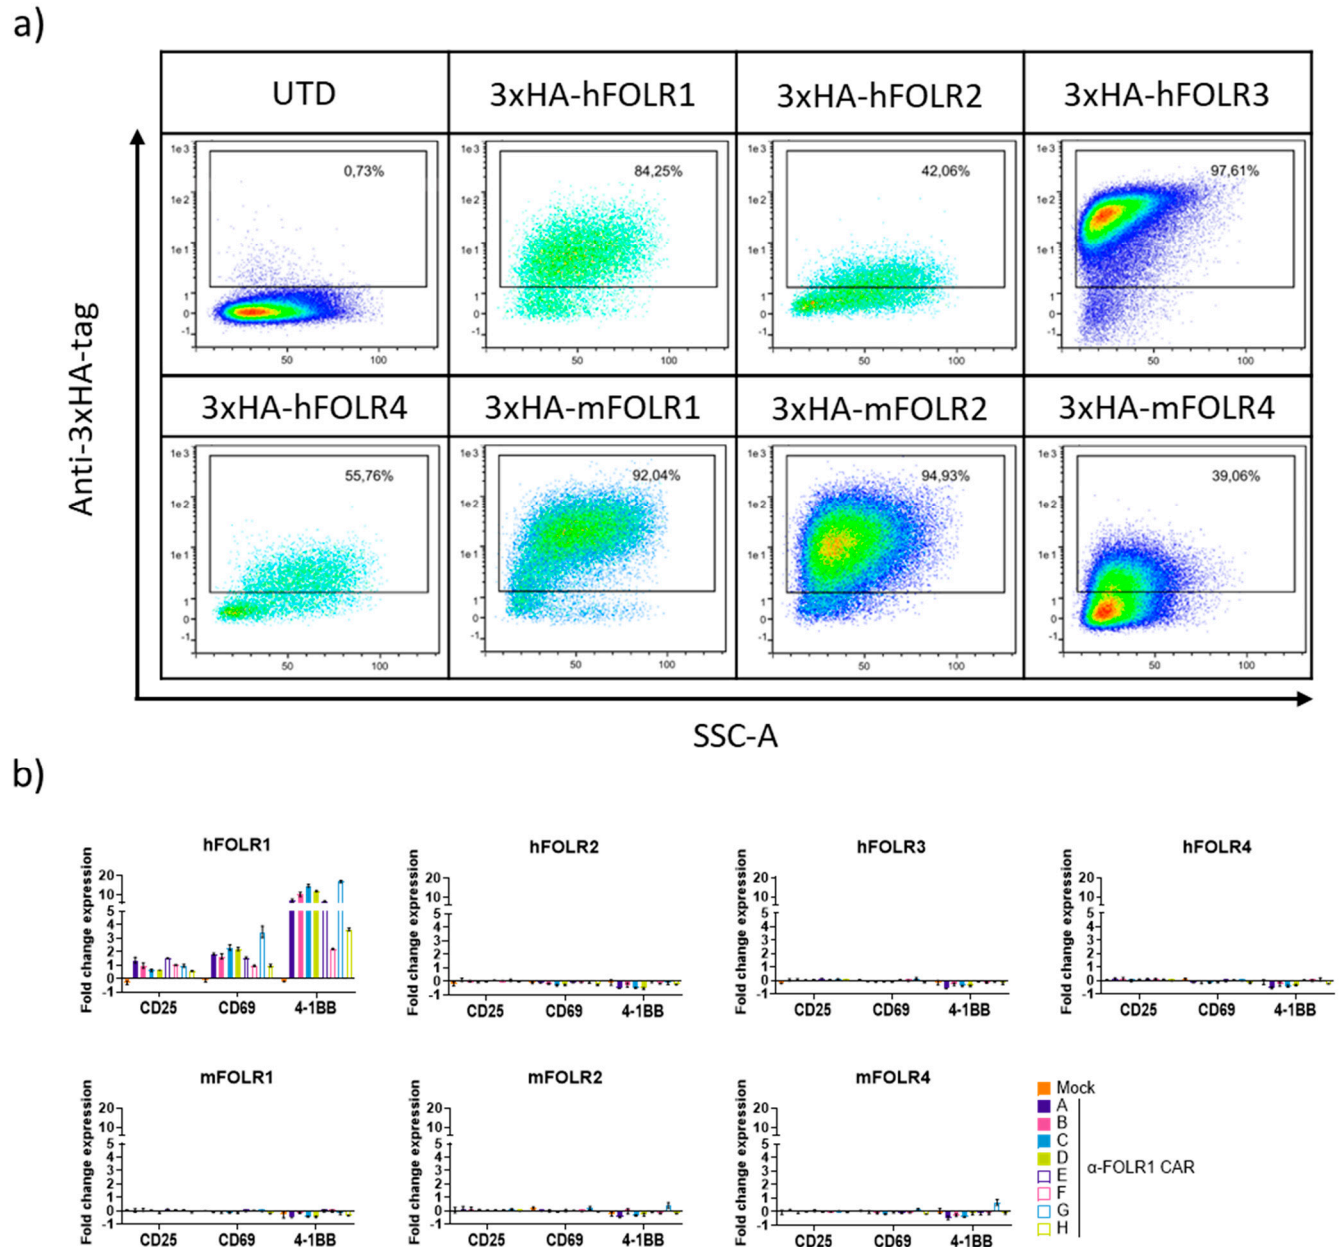

**Supplementary Figure S4.** Anti-FOLR1 CAR T cells are highly specific for human FOLR1. **(a)** Density plots from flow cytometric analysis of wt Jurkat cells or Jurkat cells expressing different human (h) or mouse (m) FOLR variants. HA-tagged FOLR variants expression was detected via an anti-3xHA-tag staining. **(b)** Activation marker CD25, CD69, and 4-1BB expressed by anti-FOLR1 CAR T cells after 48 hours of co-culture with Jurkat cells expressing different human (h) or mouse (m) FOLR variants, at an effector cell to target cell ratio of 2:1. Data points represent mean of technical triplicates and are presented as fold change relative to the respective T cell co-culture with FOLR-deficient Jurkat wt cells. Each bar represents the mean  $\pm$  SEM (n=3).

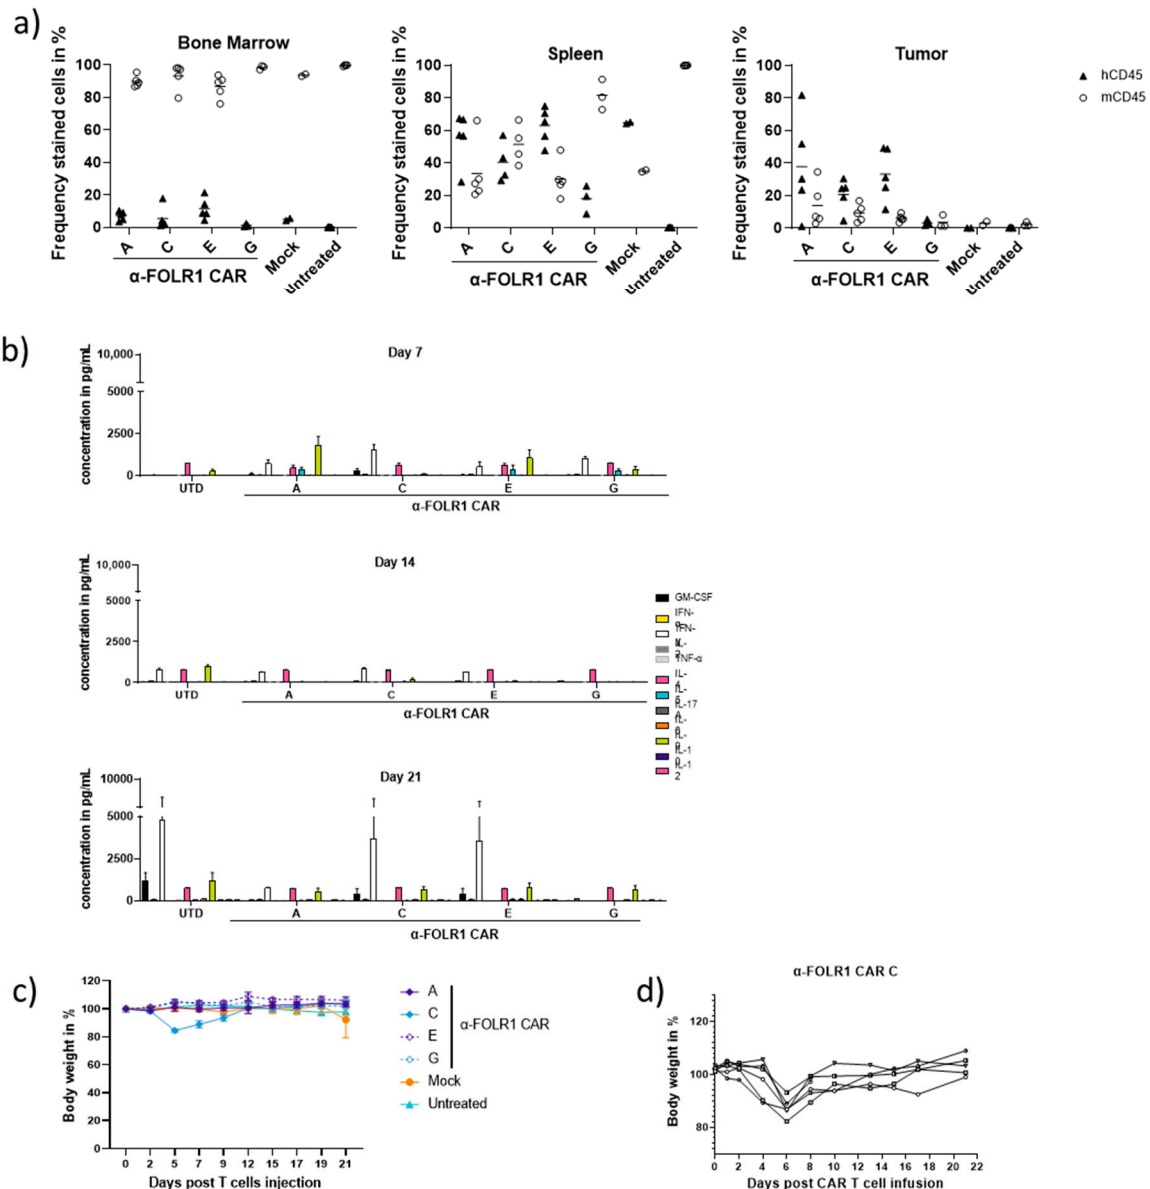

**Supplementary Figure S5.** Anti-FOLR1 CAR T candidates efficiently eradicate OV-90 wt tumors in NSG mice. **(a)** Mouse and human leucocytes composition in mouse bone marrow, spleen, and tumor was analyzed. On day 21 post T cell injection mice were sacrificed and the respective organs collected and dissociated. Single cell suspensions of the organs were analyzed *ex vivo* by flow cytometry for murine or human CD45 expression, respectively. Each data point represents an individual mouse and horizontal lines represent the mean of the respective group. **(b)** Secretion of human cytokines was analyzed in peripheral blood samples over time. Plasma was isolated from blood samples collected at day 7, 14, and 21 post T cell injection and cytokine levels were subsequently determined with the human MACSplex Cytokine 12 Kit. Data is shown as mean  $\pm$  SEM. **(c)** Body weight of tumor-bearing mice was monitored over 21 days post CAR T cell injection. Each line corresponds to an individual mouse. **(d)** Tumor-free NSG mice were intravenously injected with  $1 \times 10^7$  anti-FOLR1 CAR T cells ( $\alpha$ -FOLR1 CAR C) produced in CliniMACS Prodigy<sup>®</sup> to assess tolerability. Weight was monitored over the 21 days post injection. Each line corresponds to a single mouse.

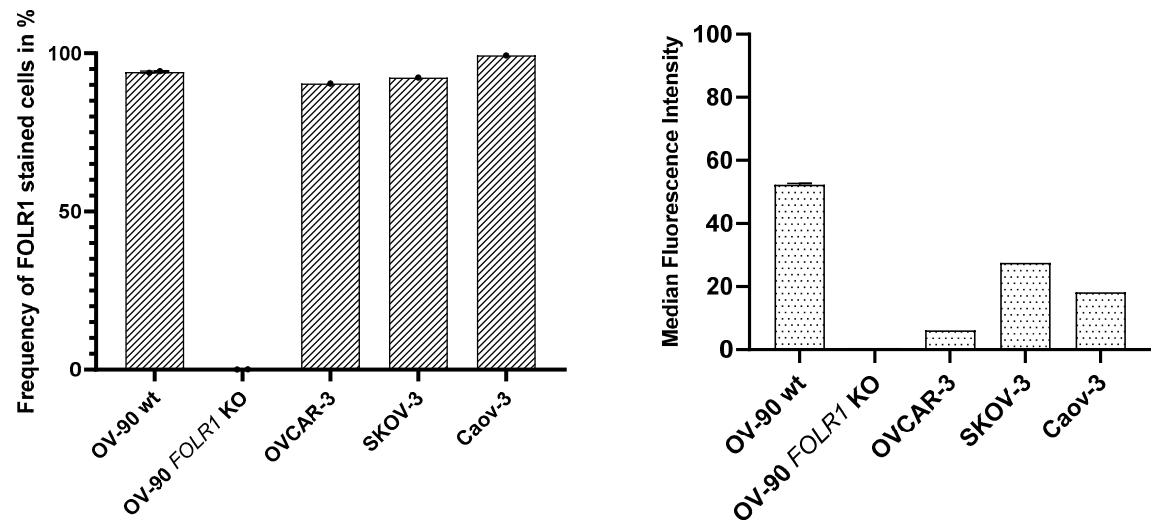

**Supplementary Figure S6.** Differential FOLR1 expression in ovarian cancer cell lines. Various ovarian cancer cell lines were analyzed for FOLR1 expression via flow cytometry.

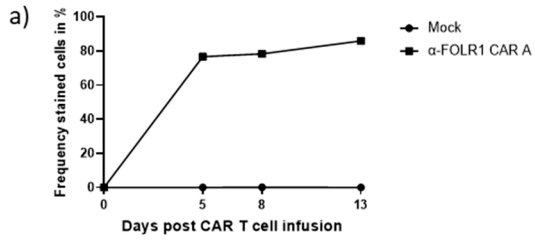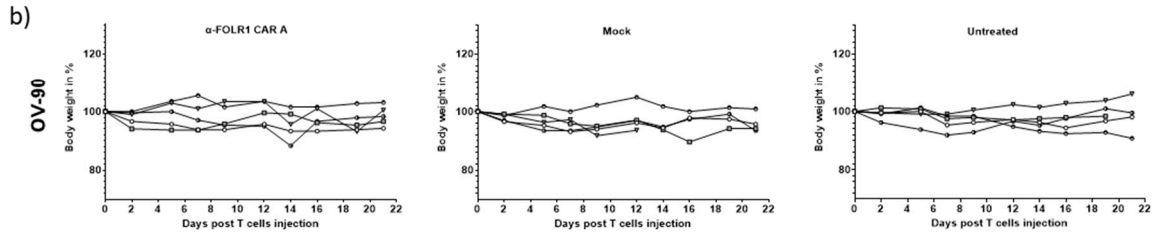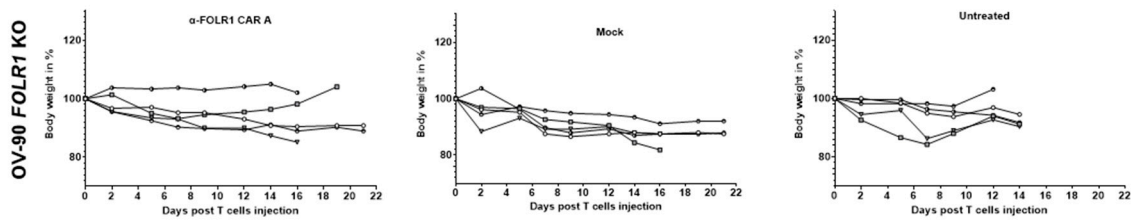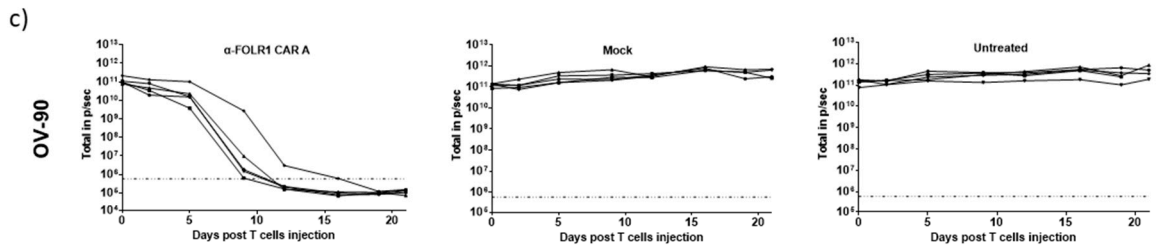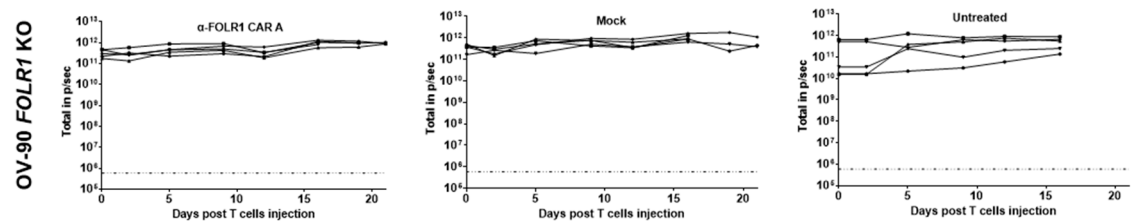



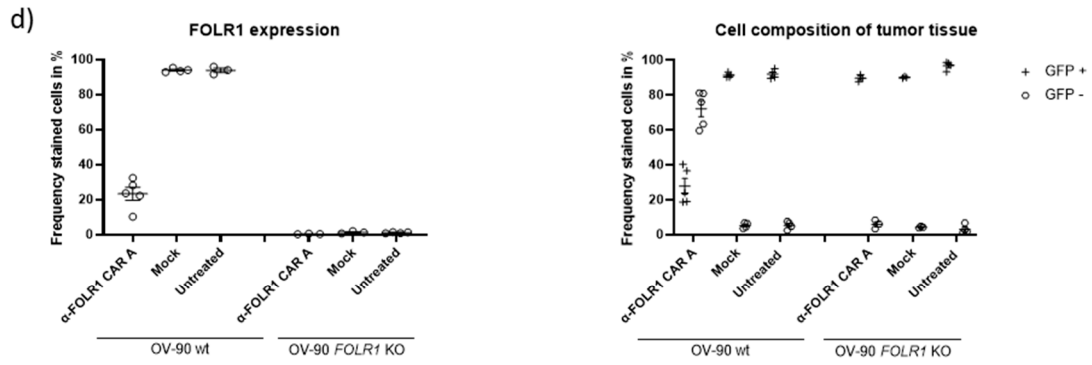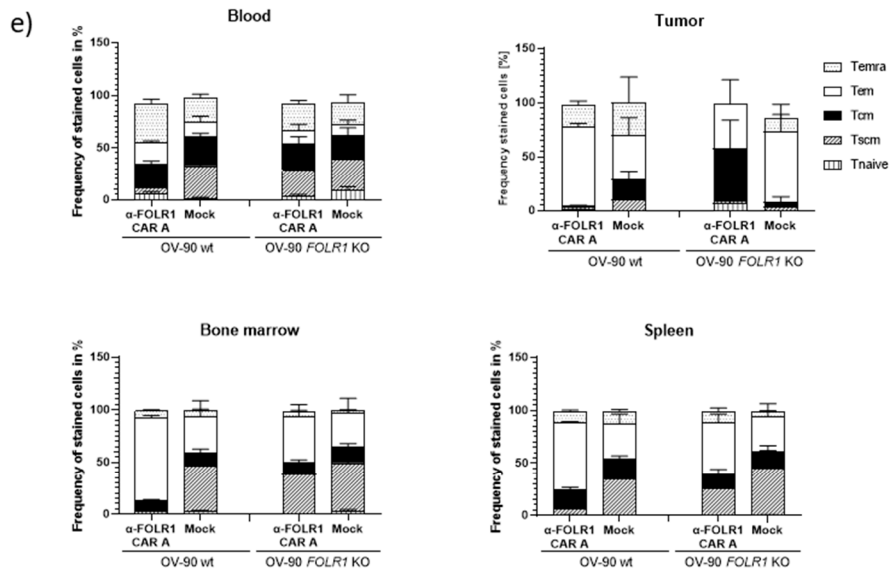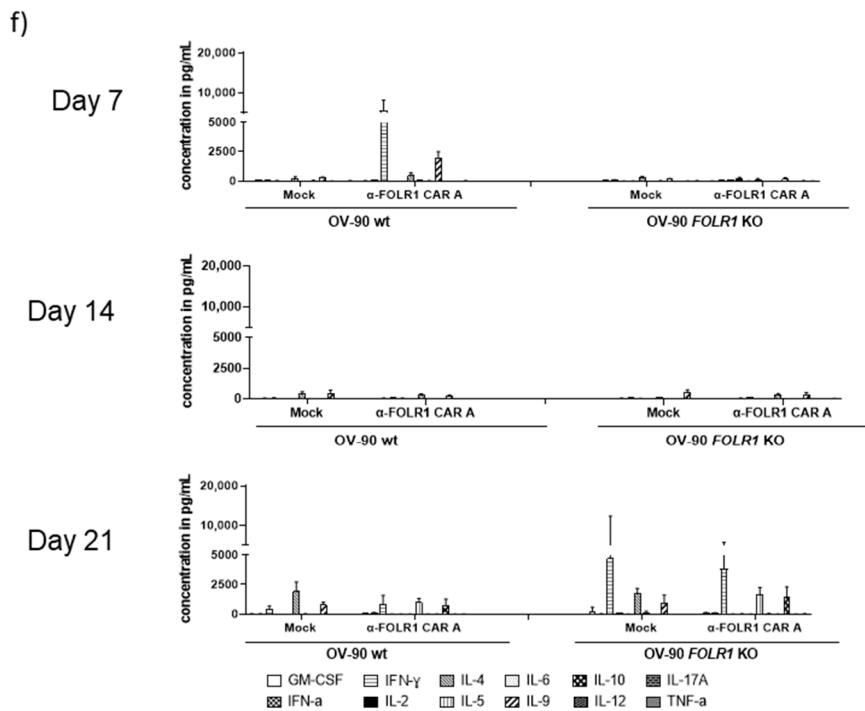

**Supplementary Figure S7.** Improved Anti-FOLR1 CAR T cells specifically eradicate OV-90 FOLR1 expressing tumors in NSG mice.

NSG mice were injected with OV-90 wt or OV-90 *FOLR1* KO cells subcutaneously and after 21 days intravenously injected with anti-FOLR1 CAR T cells ( $1 \times 10^7$  total T cells; Anti-FOLR1 CAR A) or untransduced T cells (Mock) produced in CliniMACS Prodigy® to assess anti-tumor function. **(a)** Frequency of CAR expressing T cells was monitored over time by flow cytometry (FOLR1-Fc fusion protein staining). **(b)** Body weight of mice bearing OV-90 wt or OV-90 *FOLR1* KO xenograft tumors, respectively, was monitored over 21 days post CAR T cell injection. Each line corresponds to an individual mouse. **(c)** Quantification of bioluminescence as total flux in photons per seconds (p/s) of individual mice bearing OV-90 wt or OV-90 *FOLR1* KO xenograft tumors, respectively, after CAR T cell injection over 21 days. Each line represents an individual mouse. **(d)** FOLR1 expression and cell composition in remaining tumor tissues at study endpoint was assessed. Composition of the xenograft tissue represented as GFP positive tumor cells and GFP negative non-tumor cells is depicted in the right panel. *Ex vivo* analysis were performed at the study endpoint, 21 days after CAR T cell injection for all groups. **(e)** Secretion of human cytokines was analyzed in peripheral blood samples over time. Plasma was isolated from blood samples collected at day 7, 14, and 21 post T cell injection and cytokine levels were subsequently determined with the human MACSplex Cytokine 12 Kit. Data is shown as mean  $\pm$  SEM of values. **(f)** Human CD8 T cells from mouse blood, bone marrow, spleen, and tumor were phenotyped. On day 21 post T cell injection mice were sacrificed and the respective organs collected and dissociated. Single cell suspensions of the organs were analyzed *ex vivo*. T cells were assessed for phenotype marker expression by flow cytometry. T cell subtypes were defined as following: Tscm: CD45RO<sup>-</sup>, CD197<sup>+</sup>, CD62L<sup>+</sup>, CD95<sup>+</sup>; Tnaive: CD8<sup>+</sup> or CD4<sup>+</sup>, CD45RO<sup>-</sup>, CD197<sup>+</sup>, CD62L<sup>+</sup>, CD95<sup>-</sup>; Temra: CD45RO<sup>-</sup>, CD197<sup>-</sup>, CD62L<sup>-</sup>, CD95<sup>+</sup>; Tem: CD45RO<sup>+</sup>, CD62L<sup>-</sup>, CD95<sup>+</sup>; and Tcm: CD45RO<sup>+</sup>, CD62L<sup>+</sup>, CD95<sup>+</sup>. Each bar represents mean  $\pm$  SEM of the respective group.

Supplementary Table S1 Reagent list

| Catalog no.   | product name                                                | provider                    |
|---------------|-------------------------------------------------------------|-----------------------------|
| 170-076-631   | 20 mL Reagent Bag                                           | Miltenyi Biotec             |
| 68982-0643-02 | 25% HSA                                                     | octapharma                  |
| 130-111-568   | 7-AAD Staining Solution                                     | Miltenyi Biotec             |
| 1072534       | Alt-R® CRISPR-Cas9 tracrRNA, 100 nmol                       | Integrated DNA Technologies |
| 1081058       | Alt-R™ S.p. Cas9 Nuclease V3, 100 µg                        | Integrated DNA Technologies |
| 130-092-820   | Annexin V Binding Buffer                                    | Miltenyi Biotec             |
| 130-093-060   | Annexin V conjugates                                        | Miltenyi Biotec             |
| 153304        | Anti-Folr2 (Folate receptor 2) Antibody, anti-mouse, 10/FR2 | Biolegend                   |

|             |                                                                      |                 |
|-------------|----------------------------------------------------------------------|-----------------|
| 391704      | Anti-Folr2 (Folate receptor 2) Antibody, anti-human, clone 94b/FOLR2 | Biolegend       |
| 04-968      | Anti-Folr4 (Folate receptor 4) Antibody, anti-human, clone 5E12.2    | Sigma-Aldrich   |
| 130-110-952 | Biotin Antibody, REAfinity™ (REA746) - APC                           | Miltenyi Biotec |
| 130-110-951 | Biotin Antibody, REAfinity™ (REA746) - PE                            | Miltenyi Biotec |
| FO1-H82F9   | Biotinylated Human FOLR1 Protein, Fc,Avitag™ (MALS verified)         | Acro Biosystems |
| B6542-5MG   | Brefeldin A aus Penicillium brefeldianum                             | Sigma-Aldrich   |
| HTB-75      | Caov-3 (HTB-75)                                                      | ATCC            |
| 130-123-553 | HA Antibody - APC                                                    | Miltenyi Biotec |
| 130-110-764 | CD137 Antibody, anti-human, REAfinity™ (REA765) - APC                | Miltenyi Biotec |
| 130-118-549 | CD223 Antibody, anti-human, REAfinity™ (REA351) - Vioblue            | Miltenyi Biotec |
| 130-116-205 | CD25 Antibody, anti-human, REAfinity™ (REA945) - PEVio770            | Miltenyi Biotec |
| 130-120-385 | CD279 (PD1) Antibody, anti-human, PE-Vio® 770, REAfinity™ - PEVio770 | Miltenyi Biotec |
| 130-113-138 | CD3 Antibody, anti-human, REAfinity™ (REA613) - FITC                 | Miltenyi Biotec |
| 130-110-999 | CD326 (EpCAM) Antibody, anti-human, REAfinity™ (REA764) - PE         | Miltenyi Biotec |
| 130-111-004 | CD326 (EpCAM) Antibody, anti-human, REAfinity™ (REA764) - Vioblue    | Miltenyi Biotec |
| 130-119-781 | CD366 (TIM-3) Antibody, anti-human, REAfinity™ (REA635) - APC        | Miltenyi Biotec |
| 130-113-230 | CD4 Antibody, anti-human, REAfinity™ (REA623) - Viogreen             | Miltenyi Biotec |
| 130-110-637 | CD45 Antibody, anti-human, REAfinity™ (REA747) - Vioblue             | Miltenyi Biotec |
| 130-110-799 | CD45 Antibody, anti-mouse, PE-Vio® 770, REAfinity™ - PEVio770        | Miltenyi Biotec |
| 130-120-033 | CD45RA Antibody, anti-human, REAfinity™ (REA562) - Vioblue           | Miltenyi Biotec |

|             |                                                          |                     |
|-------------|----------------------------------------------------------|---------------------|
| 130-113-556 | CD45RO Antibody, anti-human, REAfinity™ (REA611) - APC   | Miltenyi Biotec     |
| 130-113-621 | CD62L Antibody, anti-human - PEVio770                    | Miltenyi Biotec     |
| 130-112-610 | CD69 Antibody, anti-human, REAfinity™ (REA824) - Vioblue | Miltenyi Biotec     |
| 130-110-819 | CD8 Antibody, anti-human, REAfinity™ (REA734) - PEVio770 | Miltenyi Biotec     |
| 200-073-613 | CliniMACS Prodigy® Tubing Set 520                        | Miltenyi Biotec     |
| 170-076-614 | CliniMACS Prodigy® Tubing Set 620                        | Miltenyi Biotec     |
| 170-076-625 | CliniMACS® Electroporation Buffer                        | Miltenyi Biotec     |
| 170-076-327 | CliniMACS® Formulation Solution                          | Miltenyi Biotec     |
| 200-070-025 | CliniMACS® PBS/EDTA Buffer                               | Miltenyi Biotec     |
| 354277      | Corning® Matrigel® hESC-Qualified Matrix, LDEV-free      | Corning             |
| 130-111-570 | DAPI Staining Solution                                   | Miltenyi Biotec     |
| LUCK-100    | D-Luciferin, Potassium Salt (Proven and Published®)      | GoldBio             |
| L0103       | DMEM High Glucose w/ Stable Glutamine w/ Sodium Pyruvate | biowest             |
| 69504       | DNeasy Blood & Tissue Kit (50)                           | QIAGEN              |
| BS-2022-500 | FCS                                                      | Catus Biotech GmbH  |
| ACC 635     | Human embryonic kidney 293T cells (HEK293T)              | DSMZ                |
| 130-095-764 | Human IL-15                                              | Miltenyi Biotec     |
| 130-095-362 | Human IL-7                                               | Miltenyi Biotec     |
| 515-HI      | Human Male AB Serum                                      | Access Cell Culture |
| BE17-605E   | L-Glutamin                                               | Lonza               |
| 130-042-401 | LS Columns                                               | Miltenyi Biotec     |
| 200-073-903 | Luer/Spike Interconnector                                | Miltenyi Biotec     |



|             |                                                                                     |                     |
|-------------|-------------------------------------------------------------------------------------|---------------------|
| 130-091-376 | MACS BSA Stock Solution                                                             | Miltenyi Biotec     |
| 130-126-719 | MACS® Clearing Kit                                                                  | Miltenyi Biotec     |
| 130-128-157 | MACS® COPYcheck Kit, human                                                          | Miltenyi Biotec     |
| 130-106-197 | MACSPlex Custom Cytokine Assays                                                     | Miltenyi Biotec     |
| 130-099-169 | MACSPlex Cytokine Kits                                                              | Miltenyi Biotec     |
| 130-125-800 | MACSPlex Cytotoxic T/NK Cell Kit, human                                             | Miltenyi Biotec     |
| 130-093-607 | MACSQuant® Calibration Beads                                                        | Miltenyi Biotec     |
| 130-126-865 | MACSwell™ Deepwell Plates                                                           | Miltenyi Biotec     |
| 117-500     | MCDB 105 Medium (500 ml)                                                            | Sigma-Aldrich       |
| 31150030    | Medium 199, Earle's Salze                                                           | Thermo Fisher       |
| 130-097-095 | Naive Pan T Cell Isolation Kit, human                                               | Miltenyi Biotec     |
| 130-097-096 | Naive Pan T Cell Isolation Kit, human                                               | Miltenyi Biotec     |
| 303410      | Natriumbutyrat                                                                      | Sigma-Aldrich       |
| HTB-161     | NIH:OVCAR-3 (HTB-161)                                                               | ATCC                |
| CRL-11732   | OV-90 (CRL-11732)                                                                   | ATCC                |
| 130-096-535 | Pan T Cell Isolation Kit, human                                                     | Miltenyi Biotec     |
| P04-60500   | Pancoll human, Density: 1.077 g/ml                                                  | PAN-Biotech GmbH    |
| 908304      | PE anti-FOLR1 (Folate Binding Protein) Antibody                                     | BioLegend           |
| BLD-391704  | PE anti-human Folate Receptor beta (FR-beta), Clone: [94b/FOLR2], Mouse, Monoclonal | Biozol              |
| ant-pm-2    | Primocin®                                                                           | InvivoGen           |
| M0494S      | Q5 Hot Start High-Fidelity 2X Master Mix                                            | New England BioLabs |
| 28706       | QIAquick Gel Extraction Kit (NucleoSpin Gel and PCR Clean-Up Kit)                   | Qiagen              |
| ab221543    | Recombinant Anti-Folate Binding Protein/FBP antibody [EPR20277] (ab221543)          | abcam               |

|             |                                       |                  |
|-------------|---------------------------------------|------------------|
| 130-094-183 | Red Blood Cell Lysis Solution (10×)   | Miltenyi Biotec  |
| L0501       | RPMI 1640 w/o L-Glutamine             | biowest          |
| HTB-77      | SKOV-3 (HTB-77)                       | ATCC             |
| 130-111-160 | T Cell TransAct™, human               | Miltenyi Biotec  |
| 4444556     | TaqMan™ Schneller Advanced Master-Mix | ThermoFisher     |
| 170-076-306 | TexMACS™ GMP Medium                   | Miltenyi Biotec  |
| 14020108926 | Tissue Freezing Medium                | Leica Biosystems |
| T4049       | Trypsin-EDTA-Lösung                   | Sigma-Aldrich    |
